1 **Genomic prediction of autotetraploids; influence of relationship matrices, allele dosage,**  
2 **and continuous genotyping calls in the phenotype prediction**

3 Ivone de Bem Oliveira<sup>\*,†</sup>, Marcio F. R. Resende Jr.<sup>‡</sup>, Luis Felipe V. Ferrão<sup>\*</sup>, Rodrigo R.

4 Amadeu<sup>\*</sup>, Jeffrey B. Endelman<sup>§</sup>, Matias Kirst<sup>††</sup>, Alexandre S. G. Coelho<sup>†</sup>, and Patricio R.

5 Munoz<sup>\*</sup>

6

7 <sup>\*</sup>Blueberry Breeding and Genomics Lab, Horticultural Sciences Department, University of

8 Florida, Gainesville, FL, USA, 32611

9 <sup>†</sup>Plant Genetics and Genomics Lab, Agronomy College, Federal University of Goiânia, GO,

10 Brazil, 74690-900

11 <sup>‡</sup>Sweet Corn Genomics and Breeding, Horticultural Sciences Department, University of

12 Florida, Gainesville, FL, USA, 32611

13 <sup>§</sup>Department of Horticulture, University of Wisconsin, Madison, WI, USA, 53706

14 <sup>††</sup>Forest Genomics Lab, School of Forestry Resources and Conservation, University of

15 Florida, Gainesville, FL, USA, 32610

16

17 Running head: Genomic prediction in autopolyploids

18

19 **Keywords:** autopolyploid, allelic dosage, GS, relationship matrix, *Vaccinium*

20 **Corresponding author:**

21 Patricio Ricardo Muñoz

22 Blueberry Breeding & Genomics Lab

23 University of Florida

24 Address: 2550 Hull Road, P.O. Box 110690, Gainesville, FL, 32611

25 Phone: (352) 273-4837

26 Email: p.munoz@ufl.edu

27  
28  
29  
30  
31  
32  
33  
34  
35  
36  
37  
38  
39  
40  
41  
42  
43  
44  
45  
46  
47  
48  
49  
50  
51

## ABSTRACT

Estimation of allele dosage in autopolyploids is challenging and current methods often result in the misclassification of genotypes. Here we propose and compare the use of next generation sequencing read depth as continuous parameterization for autotetraploid genomic prediction of breeding values, using blueberry (*Vaccinium corybosum* spp.) as a model. Additionally, we investigated the influence of different sources of information to build relationship matrices in phenotype prediction; no relationship, pedigree, and genomic information, considering either diploid or tetraploid parameterizations. A real breeding population composed of 1,847 individuals was phenotyped for eight yield and fruit quality traits over two years. Analyses were based on extensive pedigree (since 1908) and high-density marker data (86K markers). Our results show that marker-based matrices can yield significantly better prediction than pedigree for most of the traits, based on model fitting and expected genetic gain. Continuous genotypic based models performed as well as the current best models and presented a significantly better goodness-of-fit for all traits analyzed. This approach also reduces the computational time required for marker calling and avoids problems associated with misclassification of genotypic classes when assigning dosage in polyploid species. Accuracies are encouraging for application of genomic selection (GS) for blueberry breeding. Conservatively, GS could reduce the time for cultivar release by three years. GS could increase the genetic gain per cycle by 86% on average when compared to phenotypic selection, and 32% when compared with pedigree-based selection.

52

## INTRODUCTION

53

54

55

56

57

58

59

60

61

62

63

64

65

66

67

68

69

70

71

72

73

74

75

76

Polyploidy events are not an exception in plants, as about 70% of Angiosperms and 95% of Pteridophytes underwent at least one polyploidization event (Soltis and Soltis 1999). Polyploids are normally grouped into two categories, autopolyploids and allopolyploids, but intermediate forms are also possible, such as segmental allopolyploids (Spoelhof *et al.* 2017). Thresholds for polyploid classification have been controversial, but following the general taxonomic definition, autopolyploids arise from within-species whole genome duplication, and allopolyploids arise from whole genome duplication prior to or after an inter-specific hybridization event (Soltis *et al.* 2007).

Because speciation via ploidy increase can generate new phenotypic variability, this phenomenon is considered a powerful evolutionary source (Hieter and Griffiths 1999; Soltis *et al.* 2016). Despite the important role of polyploidization in plant evolution, its effects on inheritance of many agronomic traits and population genetics are still poorly understood when compared with diploid species (Dufresne *et al.* 2014). This especially holds true for autopolyploids. The complex nature of autopolyploid genetics is due to the presence of genotypes with higher allele dosage than diploids, larger number of genotypic classes, possibility of multivalent pairing, and poor knowledge of chromosome behavior during meiosis (Slater *et al.* 2013; Dufresne *et al.* 2014; Mollinari *et al.* 2015).

The advent of high-throughput genotyping methods, associated with the development of genetic and statistical analysis tools, has generated significant genetic gains for diploid species (Desta and Ortiz 2014). However, the application of genomic information to polyploid crops remains a challenge (Comai *et al.* 2005; Grandke *et al.* 2016). Although methods for the analysis and interpretation of genetic data in polyploids have recently been described (see review in Bourke *et al.* 2018), much development is needed, especially for new breeding approaches, such as genomic selection.

77            Genomic selection (GS) is a method to increase the efficiency and accelerate the  
78 selection process in breeding programs. GS is used to capture the simultaneous effects of  
79 molecular markers distributed across the genome, based in the premise that linkage  
80 disequilibrium between causal polymorphisms and markers allow the prediction of  
81 phenotypes based on the genotypic values (Meuwissen *et al.* 2001; Zhang *et al.* 2011; de los  
82 Campos *et al.* 2013). The first GS studies addressing polyploids considered diploid genetic  
83 models to circumvent the complexity involved in accurately defining allelic dosage (i.e., the  
84 number of copies of each allele at a given polymorphic locus). Promising results have been  
85 reported for polyploids (e.g. Gouy *et al.* 2013; Annicchiarico *et al.* 2015; Ashraf *et al.* 2016),  
86 however simplified assumptions were mostly used for genetic and statistical inferences  
87 (Garcia *et al.* 2013). Only a few studies have added different factors accounting for polyploid  
88 effects (e.g., Slater *et al.* 2016; Sverrisdottir *et al.* 2017). Thus, more appropriate methods for  
89 GS in polyploids could be evaluated, possibly improving trait prediction.

90            Polyploidy can affect phenotypes through allelic dosage (additive effect of multiple  
91 copies of the same alleles), or by creating more complex interactions between loci or alleles,  
92 such as dominance or epistasis (Osborn *et al.* 2003). Thus, the inclusion of allelic dosage  
93 information may improve GS results (e.g., better fit, increase of accuracy) by creating a more  
94 realistic representation of the effects of each genotypic class. Although the evidence of  
95 dosage effects in the expression of important economic traits exists (Guo *et al.* 1996; Birchler  
96 *et al.* 2001; Adams *et al.* 2003; Osborn *et al.* 2003), few studies linking dosage effects to  
97 phenotype prediction have been reported in autopolyploid species (e.g.; Slater *et al.*, 2016;  
98 Sverrisdottir *et al.* 2017; Nyine *et al.* 2018; Endelman *et al.* 2018). It is interesting to note  
99 that genotype classification is one of the major challenges for polyploids. Studies about  
100 genotyping calling evaluation for autopolyploids with next generation sequencing (NGS) data

101 showed that none of the existing methods performs properly (Grandke *et al.* 2016), unless  
102 high sequencing coverage (60-80x) is used (Uitdewilligen *et al.* 2013).

103 Here we compare a novel approach to GS in the context of autopolyploid, using  
104 *Vaccinium corymbosum* (southern highbush blueberry, SHB) as a model. The cultivated SHB  
105 is an autotetraploid, presenting  $2n = 4X = 48$  chromosomes (Lyrene *et al.* 2002). Inbreeding  
106 depression is strong in SHB and population improvements have been achieved by long-term  
107 recurrent phenotypic selection alongside with long testing phase and slow genetic gain per  
108 generation (Lyrene 2008). Our goal was to investigate and compare the influence of different  
109 relationship matrices that consider different ploidy information on phenotype prediction,  
110 using novel genotyping approaches based on next-generation sequencing.

111

## 112 MATERIAL AND METHODS

### 113 Population and phenotyping

114 The population used in this study encompasses one cycle of the University of Florida  
115 blueberry breeding program's recurrent selection, comprising 1,847 SHB individuals. This  
116 population was originated from 124 biparental controlled crosses, from 146 parents that  
117 presented superior phenotypic performance (cultivars and advanced stage of breeding).  
118 Phenotypic data of eight yield and fruit quality-related traits were collected during two  
119 production seasons (2014 and 2015), when the plants were 2.5 and 3.5 years of age. Yield  
120 (rated using a 1-5 scale), weight (g), firmness ( $\text{g mm}^{-1}$  of compression force), scar diameter  
121 (mm), fruit diameter (mm), flower bud density (reported as buds per 20 cm of shoot), soluble  
122 solids content ( $^{\circ}\text{Brix}$ ), and pH were evaluated. The last three traits were phenotyped only in  
123 one year – soluble solids content and pH were phenotyped in 2014 and flower buds in 2015.

124 Five berries (fully mature and presenting picking quality) were randomly sampled to  
125 compose the measurement of fruit traits for each individual. Fruit weight was measured using

126 an analytical scale (CP2202S, Sartorius Corp., Bohemia, NY). The FirmTech II firmness  
127 tester (BioWorks Inc., Wamego, KS) was used to measure fruit diameter and firmness. The  
128 scar diameter was obtained by image analysis of the fruits using FIJI software (Schindelin *et*  
129 *al.* 2012). The number of flower buds was counted in the main cane upright shoot, in the top  
130 20 cm. A digital pocket refractometer (Atago, U.S.A., Inc., Bellevue, WA) was used to obtain  
131 soluble solids measures from 300µl of berry juice. The pH was measured using a glass pH  
132 electrode (Mettler-Toldeo, Inc., Schwerzenbach, Switzerland). More details are provided by  
133 Amadeu *et al.* (2016), Cellon *et al.* (2018), and Ferrão *et al.* (2018).

134

### 135 **Genotyping**

136 Genomic DNA was extracted and genotyped using sequence capture by Rapid  
137 Genomics (Gainesville, FL, USA). Polymorphisms were genotyped in genomic regions  
138 captured by 31,063 120-mer biotinylated probes, designed based on the 2013 blueberry draft  
139 genome sequence (Bian *et al.* 2014; Gupta *et al.* 2015). Sequencing was performed in the  
140 Illumina HiSeq2000 platform using 100 cycle paired-end sequencing. After trimming (quality  
141 score of 20), demultiplexing, and removing barcodes, reads were aligned to the draft genome  
142 using Mosaik v.2.2.3 (Lee *et al.* 2014). Genotypes were called using FreeBayes v.1.0.1  
143 (Garrison and Marth 2012) considering the diploid and tetraploid options. Single-nucleotide  
144 polymorphisms (SNPs) were filtered considering i) minimum sequencing depth of 40  
145 (average depth for the population); ii) minimum SNP quality score (QUAL) of 10; iii) only  
146 biallelic markers; iv) maximum population missing data of 0.5; and v) minor population  
147 allele frequency of 0.05. After filtering a total of 85,973 SNP were used in the GS analysis.  
148 Further information regarding population composition and genotyping approach were  
149 described in Ferrão *et al.* (2018). The genotypes for the diploid calling were coded as 0 (AA),  
150 1 (AB), or 2 (BB). For the tetraploid parameterization they were coded as 0 (AAAA), 1

151 (AAAB), 2 (AABB), 3 (ABBB), and 4 (BBBB). A third parameterization (assumption-free  
152 method) was used, which considered allele ratio  $\#A/(\#A + \#a)$ , where  $\#A$  is the allele count  
153 (sequencing depth) of the alternative allele and  $\#a$  is the allele count of the reference allele.  
154 No dosage calling was performed in this model (File S1); these data varied continuously  
155 between 0 and 1.

156

### 157 **Population genetics analysis**

158 In order to compare the information captured by each genomic-based relationship  
159 matrix, we performed linkage disequilibrium (LD), and principal components (PC) analyses.  
160 Pearson correlation tests ( $r^2$ ) were performed for pairwise LD estimation among SNPs within  
161 scaffolds, considering draft reference genomes (Bian *et al.* 2014; Gupta *et al.*, 2015). One  
162 SNP was randomly sampled per probe interval, and a total of 22,914 SNP were used in the  
163 analysis. LD was obtained for all marker-based scenarios: i) diploid ( $G2$ ); ii) tetraploid ( $G4$ )  
164 and iii) ratio (*i.e.*, continuous genotypes;  $Gr$ ). The LD decay over physical distance was  
165 determined as the mean distance at the LD threshold of  $r^2 = 0.2$ . To compare the LD among  
166 scenarios, the mean distances (Kb) and their interval confidences at  $r^2 = 0.2$  were compared.  
167 The diversity captured from each relationship matrix was compared by PC using the R  
168 package adegenet v. 1.3-1 (Jombart and Ahmed 2011).

169 In order to compare the information present in the marker matrices, we also evaluated  
170 the observed heterozygosity in the population. For this, we obtained the ratio between the  
171 number of heterozygote genotypes and the total number of individuals. To estimate the  
172 heterozygosity for the continuous genotypes, empirical limits were established based on the  
173 mean and standard deviations presented for homozygotes classes of the tetraploid  
174 parameterization.

175



## 176 **Models**

177 One-step single-trait Bayesian linear mixed models were used to predict breeding  
178 values for each individual in the population, as follows:

$$179 \quad \bar{y} = \mu + Xb + Z_1c + Z_2r + Z_3a + Z_4bxa + e \quad (1)$$

180 Where  $\bar{y}$  is a vector of the phenotypic values of the trait being analyzed,  $\mu$  is the  
181 population's overall mean,  $b$  is the fixed effect of year,  $c$  is the random effect of  $i$ th column  
182 position in the field  $\sim N(0, I\sigma_c^2)$ ,  $r$  is the random effect of the  $i$ th row position in the field  $\sim N$   
183  $(0, I\sigma_r^2)$ ,  $a$  is the random effect of genotype  $\sim N(0, G_a\sigma_a^2)$ , where  $G_a$  was replaced by the  
184 different additive relationship matrices as described in the next section. The  $bxa$  is the  
185 random effect of the year by genotype interaction  $\sim N(0, I\sigma_{bxa}^2)$ , and  $e$  is the random residual  
186 effect  $\sim N(0, I\sigma_e^2)$ . Row and column effects were considered nested within year only for the  
187 traits evaluated in two years. For traits measured a single year, the same equation (1) was  
188 used without the year and the year by genotype interactions. The variance components for  
189 each random variable were: additive ( $\sigma_a^2$ ), column ( $\sigma_c^2$ ), row ( $\sigma_r^2$ ), year-by-genotype  
190 interaction ( $\sigma_{bxa}^2$ ), and residual ( $\sigma_e^2$ ).  $X$ ,  $Z_1$ ,  $Z_2$ ,  $Z_3$ , and  $Z_4$  were incidence matrices for year,  
191 column, row, genotype, and year by genotype interaction, respectively. The narrow-sense  
192 heritabilities were estimated considering the ratio between the additive variance component  
193 and the total phenotypic variance (sum of all variance components).

194

## 195 **Relationship matrices**

196 To quantify the effect of the genetic information used to build the relationship  
197 matrices on the predictive ability (PA), we performed analyses considering different  
198 approaches to modeling the genotypic values in autotetraploid species (Table 1, File S1). The  
199 factors tested were: i) the source of information used to build the relationship matrix

200 (pedigree, genomic, or no relationship information); and ii) ploidy information (diploid,  
 201 tetraploid, and assumption-free method).

202

203 **Table 1.** Methods and assumptions used to compare the influence of relationship matrices,  
 204 ploidy and continuous genotypes in the prediction of breeding values for blueberry.

| Relationship matrix | Model | Ploidy assumption | Methodology               |
|---------------------|-------|-------------------|---------------------------|
| Identity            | $I$   | none              | none                      |
| Pedigree-based      | $A2$  | 2                 | Henderson (1976)          |
|                     | $A4$  | 4                 | Kerr <i>et al.</i> (2012) |
|                     | $G2$  | 2                 |                           |
| Maker-based         | $G4$  | 4                 | VanRaden (2008)           |
|                     | $Gr$  | none              |                           |

205

206 The methods chosen to obtain the relationship matrices are shown in the Table 1. The  
 207 pedigree-based relationship matrices ( $A$ ) were built considering a diploid model (Henderson  
 208 1976) and autotetraploid model without double-reduction (Kerr *et al.* 2012). The marker-  
 209 based relationship matrices ( $G$ ) were based on the incidence matrices of markers effects ( $X$ )  
 210 according to VanRaden (2008) and adapted by Ashraf *et al.* (2016). Different assumptions  
 211 can be made regarding the marker allele dosage in autotetraploids (Table 2). We built the  $X$   
 212 matrices under three assumptions regarding the additive marker allele dosage effect: *i*) a  
 213 pseudo-diploid model, where all the heterozygous genotypes are assumed as one class,  
 214 corresponding to a unique effect (data coded as 0, 1, and 2); *ii*) an additive autotetraploid  
 215 model, where each genotype had a specific value, and cumulative additive effect is assumed  
 216 (data coded as 0, 1, 2, 3, and 4); and *iii*) an assumption-free method based on the ratio of  
 217 reads count for the alternative and reference alleles (continuous parameterization, assuming  
 218 values between 0 and 1), where also a cumulative additive effect is assumed. For the  
 219 construction of the relationship matrices based on marker data, the missing genotypes were  
 220 substituted by the mean. The R package AGHmatrix v. 0.0.3003 (Amadeu *et al.* 2016) was  
 221 used to obtain all relationship matrices.

222 **Table 2.** Genotype codes for marker-allele dosage effects with different assumptions.  
223 Adapted from Slater *et al.* (2016).

| Genotype | Pseudo-Diploid | Autotetraploid | Continuous values* |
|----------|----------------|----------------|--------------------|
| AAAA     | 0              | 0              |                    |
| AAAB     | 1              | 1              |                    |
| AABB     | 1              | 2              | 0 - 1              |
| ABBB     | 1              | 3              |                    |
| BBBB     | 2              | 4              |                    |

\* Continuous values with a ploidy assumption-free parameterization

224

## 225 **Model implementation**

226 The six models described above (Table 1) were fitted using the R package (R Core  
227 Team 2018) BGLR v. 1.0.5. (de los Campos and Pérez-Rodríguez 2016). The predictions  
228 were based on 30,000 iterations of the Gibbs sampler, in which 5,000 were taken as burn-in,  
229 and a thinning of five. The number of iterations, burn-in, and thinning interval parameters  
230 were evaluated to define the final values used in the analysis (Figure S1). A single step  
231 regression approach was applied to perform all phenotypic BLUP (I matrix), pedigree-BLUP  
232 (P-BLUP), and genomic-BLUP (G-BLUP). Default hyper-parameters were previously  
233 described (Perez and de los Campos 2014).

234

## 235 **Validation and model comparison**

236 For each trait, models were compared based on their PA, stability (mean square  
237 errors), goodness-of-fit, and expected genetic gain. A 10-fold cross validation scheme was  
238 applied to compute model PA. Because each validation group might have a different mean  
239 (Resende *et al.* 2012b), the phenotypic PA were obtained as the Pearson correlation  
240 coefficient between the empirical best linear unbiased estimation values (eBLUEs) obtained  
241 by considering all the variables in the equations 1 as fixed (*i.e.*, Least Square means  
242 estimations; LSMeans) and the cross-validated breeding values (BV) predicted by the models  
243 for each validation fold. The goodness-of-fit for the different models was evaluated with

244 measures of the posterior mean of the log likelihood obtained from the full data set. The  
245 model with the lowest value for this parameter defined the best fit for the data. For the  
246 expected genetic gain estimation we used the following formula:  $\Delta G = (PA \cdot \sigma_a \cdot i) / L$ , where  
247  $PA$  is the phenotypic predictive ability,  $\sigma_a$  is the square root of additive genetic variance in  
248 the population,  $i$  is the selection intensity, and  $L$  is the breeding cycle length. The selection  
249 intensity ( $i$ ) was considered constant for all methods.

250 Phenotypic and genotypic data used for diploid and tetraploid parameterizations are  
251 available from Dryad Digital Repository (accession number doi: 10.5061/dryad.kd4jq6h).  
252 Data for continuous parameterization is available for review upon request. Data will be  
253 available at Dryad Digital Repository. The authors affirm that all data necessary for  
254 confirming the conclusions of the article are present within the article, figures, and tables.

255

256

## RESULTS

### 257 Population genetics analysis

258 Linkage disequilibrium decayed below  $r^2 = 0.2$  at distances of 88.3 Kb, 92.6 Kb, and  
259 98.2 Kb for the diploid, tetraploid and continuous models, respectively (Figure 1A-C). No  
260 significant difference was observed considering the confidence interval for the mean distance  
261 (Kb) at  $r^2 = 0.2$  among different ploidies and continuous genotyping scenarios (Figure S2).

262 Similarly, no major differences were found between parameterizations within  
263 methodology (*i.e.*, pedigree-based or marker-based methods) in the PC analysis (Figure S3).  
264 The first two PC components of the marker-based ( $G$ ) matrices were consistent across all  
265 matrices, explaining approximately 20% of the variation. For example,  $G2$  matrix captured  
266 20.60% of the variation, while  $G4$  captured 21.71%, and  $Gr$  captured 23.36% (Figure S3 A-  
267 C). The PC results were consistent between pedigree methodologies as well. Approximately  
268 38% of the variation was explained (*i.e.*, 37.74% of the variability was explained for the  $A2$

269 matrix and 37.86% was explained for the *A4* matrix, Figure S3 D-E). The results obtained in  
 270 the PC analysis did not justify a stratified sampling of cross-validation populations, since no  
 271 evidence of sub-population structure was detected for any of the relationship matrices.

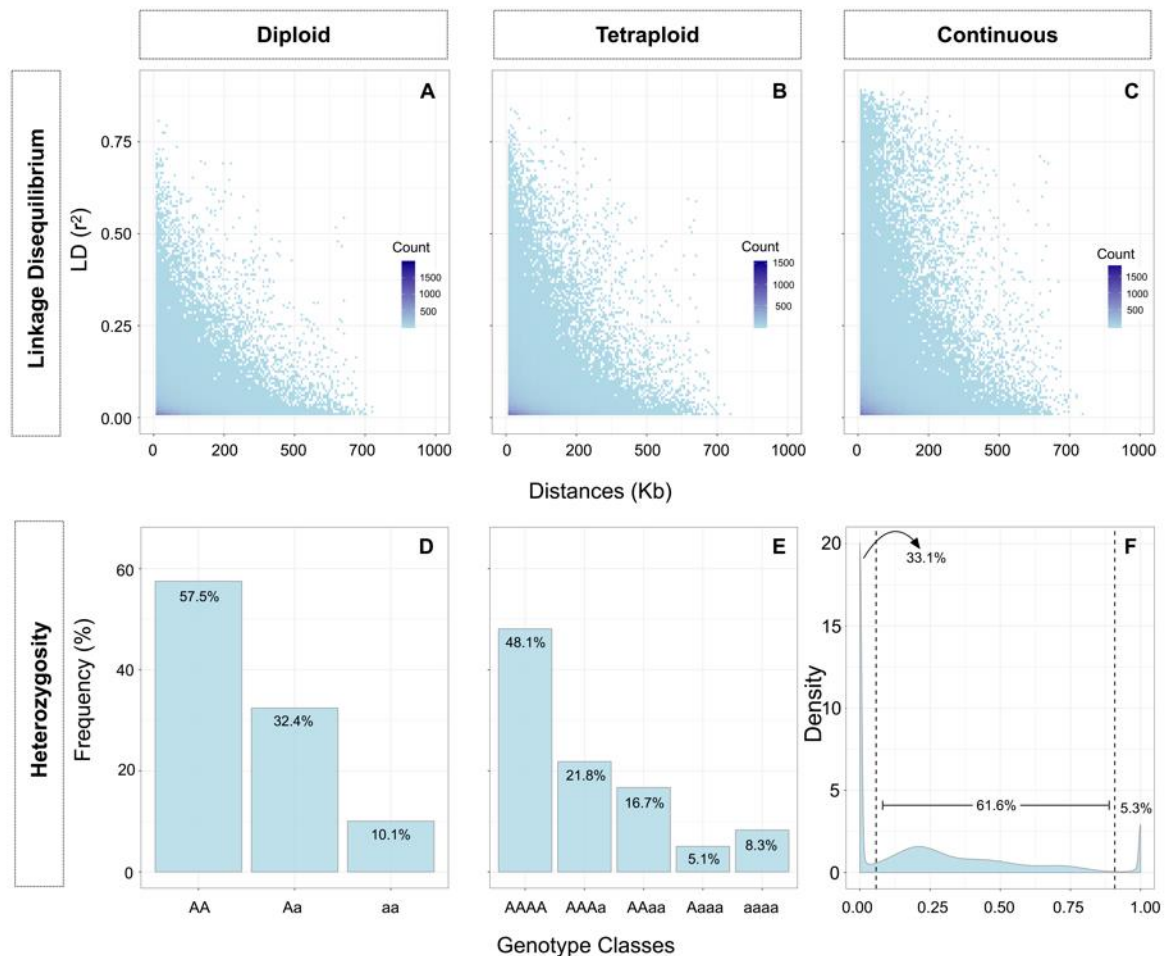

272 **Figure 1.** Linkage disequilibrium decay and heterozygosity for blueberry. Linkage  
 273 disequilibrium decay estimation using one marker per probe, within scaffolds for (A) diploid,  
 274 (B) tetraploid and (C) continuous genotype parameterizations. Heterozygosity observed in  
 275 (D) diploid, (E) tetraploid, and (F) heterozygosity empirically established for the continuous  
 276 genotypes scenario, assuming the limits of  $0.058 \leq X \leq 0.908$ .  
 277  
 278

279 Considering the heterozygosity observed in each scenario, genotypes assumed as  
 280 homozygotes in the diploid parameterization were classified as one of the possible  
 281 heterozygote classes in the tetraploid and in the assumption-free parameterizations (Figure  
 282 1D-F). As a result of this process, the tetraploid parameterization presented 37.50% more  
 283 heterozygotes than the diploid parameterization. Considering the empirical thresholds  
 284 established to compare the proportion of “heterozygotes” in the continuous genotypes with

285 the ploidy parameterizations, values equal to or below 0.058 and equal to or above 0.908  
286 were considered as “homozygotes” classes (dashed lines, Figure 1F). With this, 61.59% of  
287 the genotypes were considered “heterozygotes”, thus the continuous method would have  
288 presented 89.92% and 41.23% more heterozygotes than the diploid and the tetraploid  
289 parameterization, respectively. Nevertheless, some misclassification of data into classes in  
290 the diploid and tetraploid parameterization might have occurred (Figure 2A-B).  
291

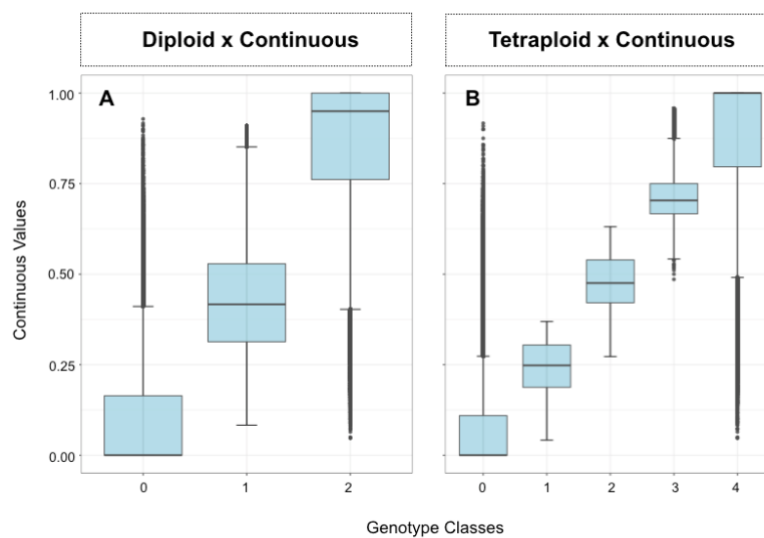

292  
293 **Figure 2.** Relationship of the continuous values considering the classes assumed in the (A)  
294 diploid and (B) tetraploid parameterizations.

295  
296 **Variance estimates**

297 The posterior means of the genetic parameters are summarized in Table 3. All the traits  
298 presented additive genetic variance significantly higher than zero. A wide range of variance  
299 was observed within a given parameter for the different methodologies, and most of the  
300 values were significantly different from each other (considering Tukey test results; Table 3,  
301 Table S1). Marker-based methodologies generated significantly smaller estimations for  
302 variance components when compared with pedigree-based estimations. Within marker-based  
303 methodologies, the assumption-free parameterization generated significantly smaller  
304 estimations. The effects of the difference in the estimation of variance components are

305 reflected in the estimated heritabilities – smaller values were estimated for marker-based  
 306 methodologies. The lowest heritability was obtained for soluble solids, flower buds, and pH.  
 307 Considering all methods, narrow-sense heritability values varied between 0.152 and 0.574,  
 308 for flower buds and fruit weight, respectively.

309 **Table 3.** Genetic parameters estimated for eight yield and fruit-related traits analyzed with  
 310 six linear mixed models, considering the use of ploidy information and continuous genotypes.  
 311 Source of information, and dosage parameterizations for the relationship matrices indicated  
 312 by the letters (*I*, *A*, or *G*), and numbers (2 or 4), respectively\*

| Trait                 | Relationship matrix | Additive Variance | Residual Variance | Heritability | Goodness-of-fit <sup>1</sup> | EGG <sup>2</sup> 2014 | EGG <sup>2</sup> 2015 |
|-----------------------|---------------------|-------------------|-------------------|--------------|------------------------------|-----------------------|-----------------------|
| Soluble Solid (°Brix) | <i>I</i>            | 0.806 b           | 1.794 d           | 0.257 a      | -2976.31 a                   | 0.018 b               | -                     |
|                       | <i>A2</i>           | 0.777 c           | 2.129 b           | 0.239 b      | -3149.85 c                   | 0.021 ab              | -                     |
|                       | <i>A4</i>           | 0.764 c           | 2.125 b           | 0.236 b      | -3148.067 c                  | 0.021 ab              | -                     |
|                       | <i>G2</i>           | 0.848 a           | 2.026 c           | 0.262 a      | -3106.762 b                  | 0.028 a               | -                     |
|                       | <i>G4</i>           | 0.673 d           | 2.109 b           | 0.215 c      | -3142.493 c                  | 0.026 a               | -                     |
|                       | <i>Gr</i>           | 0.546 e           | 2.241 a           | 0.174 d      | -3195.892 d                  | 0.022 ab              | -                     |
| Flower Buds           | <i>I</i>            | 2.133 a           | 4.752 d           | 0.270 a      | -4024.785 a                  | -                     | 0.018 a               |
|                       | <i>A2</i>           | 1.247 cd          | 6.080 a           | 0.153 de     | -4275.597 d                  | -                     | 0.019 a               |
|                       | <i>A4</i>           | 1.232 d           | 6.070 a           | 0.152 e      | -4274.008 d                  | -                     | 0.018 a               |
|                       | <i>G2</i>           | 2.106 a           | 5.562 c           | 0.251 b      | -4192.561 b                  | -                     | 0.030 a               |
|                       | <i>G4</i>           | 1.526 b           | 5.881 b           | 0.188 c      | -4244.712 c                  | -                     | 0.025 a               |
|                       | <i>Gr</i>           | 1.315 c           | 6.115 a           | 0.161 d      | -4281.097 d                  | -                     | 0.023 a               |
| Fruit Diameter        | <i>I</i>            | 2.236 f           | 6.804 b           | 0.162 f      | -8142.071 a                  | 0.047 b               | 0.041 c<br>0.054      |
|                       | <i>A2</i>           | 3.647 a           | 6.854 b           | 0.250 a      | -8147.133 a                  | 0.063 b               | bc<br>0.054           |
|                       | <i>A4</i>           | 3.581 b           | 6.825 b           | 0.247 b      | -8141.58 a                   | 0.061 b               | bc<br>0.079 a         |
|                       | <i>G2</i>           | 3.428 c           | 6.799 b           | 0.242 c      | -8139.628 a                  | 0.088 a               | 0.072<br>ab           |
|                       | <i>G4</i>           | 2.992 d           | 6.954 ab          | 0.216 d      | -8178.698 ab                 | 0.083 a               | 0.071<br>ab           |
|                       | <i>Gr</i>           | 2.910 e           | 7.219 a           | 0.207 e      | -8243.89 b                   | 0.082 a               | 0.071<br>ab           |
| Fruit Firmness        | <i>I</i>            | 509.180 f         | 737.735 b         | 0.275 f      | -16181.026 a                 | 0.567 c               | 0.798 c               |
|                       | <i>A2</i>           | 806.908 a         | 741.089 b         | 0.401 a      | -16183.975 a                 | 0.881 b               | 1.16 b                |
|                       | <i>A4</i>           | 786.601 b         | 742.547 b         | 0.395 b      | -16189.39 a                  | 0.877 b               | 1.135 b               |
|                       | <i>G2</i>           | 725.192 c         | 734.332 b         | 0.376 c      | -16171.694 a                 | 1.243 a               | 1.511 a               |
|                       | <i>G4</i>           | 659.584 e         | 749.865 b         | 0.351 e      | -16207.163 a                 | 1.217 a               | 1.446 a               |
|                       | <i>Gr</i>           | 687.685 d         | 783.729 a         | 0.354 d      | -16283.119 b                 | 1.257 a               | 1.490 a               |
| pH                    | <i>I</i>            | 0.053 a           | 0.118 d           | 0.253 a      | -592.837 a                   | 0.005 a               | -                     |
|                       | <i>A2</i>           | 0.052 a           | 0.140 c           | 0.241 b      | -764.731 b                   | 0.006 a               | -                     |
|                       | <i>A4</i>           | 0.052 a           | 0.140 c           | 0.238 b      | -762.886 b                   | 0.005 a               | -                     |
|                       | <i>G2</i>           | 0.052 a           | 0.141 c           | 0.241 b      | -769.534 b                   | 0.007 a               | -                     |
|                       | <i>G4</i>           | 0.040 b           | 0.147 b           | 0.191 c      | -805.822 c                   | 0.006 a               | -                     |
|                       | <i>Gr</i>           | 0.035 c           | 0.153 a           | 0.165 d      | -840.501 d                   | 0.006 a               | -                     |

|              |           |         |          |         |             |         |         |
|--------------|-----------|---------|----------|---------|-------------|---------|---------|
| Fruit Scar   | <i>I</i>  | 0.086 f | 0.073 d  | 0.381 f | -351.218 a  | 0.008 c | 0.009 c |
|              | <i>A2</i> | 0.139 a | 0.075 c  | 0.528 a | -395.541 ab | 0.013 b | 0.014 b |
|              | <i>A4</i> | 0.135 b | 0.075 bc | 0.522 b | -414.241 bc | 0.013 b | 0.014 b |
|              | <i>G2</i> | 0.123 d | 0.075 cd | 0.500 c | -392.265 ab | 0.018 a | 0.018 a |
|              | <i>G4</i> | 0.115 e | 0.077 b  | 0.479 e | -451.945 c  | 0.018 a | 0.017 a |
|              | <i>Gr</i> | 0.126 c | 0.081 a  | 0.494 d | -538.444 d  | 0.019 a | 0.018 a |
| Fruit Weight | <i>I</i>  | 0.217 f | 0.214 b  | 0.374 f | -2215.277 b | 0.013 c | 0.014 c |
|              | <i>A2</i> | 0.403 a | 0.207 c  | 0.574 a | -2157.103 a | 0.021 b | 0.021 b |
|              | <i>A4</i> | 0.393 b | 0.205 c  | 0.568 b | -2136.886 a | 0.021 b | 0.021 b |
|              | <i>G2</i> | 0.344 d | 0.206 c  | 0.535 c | -2152.251 a | 0.030 a | 0.029 a |
|              | <i>G4</i> | 0.323 e | 0.215 b  | 0.513 e | -2220.552 b | 0.029 a | 0.027 a |
|              | <i>Gr</i> | 0.352 c | 0.231 a  | 0.522 d | -2349.684 c | 0.030 a | 0.028 a |
| Yield        | <i>I</i>  | 0.326 f | 0.444 bc | 0.310 f | -3683.364 a | 0.012 b | 0.015 c |
|              | <i>A2</i> | 0.549 a | 0.442 bc | 0.447 a | -3668.232 a | 0.019 a | 0.022 b |
|              | <i>A4</i> | 0.536 b | 0.442 bc | 0.441 b | -3667.668 a | 0.020 a | 0.021 b |
|              | <i>G2</i> | 0.470 c | 0.441 c  | 0.407 c | -3662.062 a | 0.026 a | 0.030 a |
|              | <i>G4</i> | 0.421 d | 0.458 b  | 0.374 d | -3730.163 a | 0.024 a | 0.028 a |
|              | <i>Gr</i> | 0.411 e | 0.493 a  | 0.356 e | -3864.783 b | 0.023 a | 0.027 a |

313 \*Letters based on Tukey test performed considering estimations obtained from 10 independent runs of the full models with  
 314 BGLR (equation 1). <sup>1</sup> Posterior Mean of the Log Likelihood. <sup>2</sup> Expected Genetic Gain on trait scale.

315

## 316 **Effect of the genetic information to build the relationship matrices**

317 The incorporation of relationship information in the analysis generated better PA  
 318 results than the phenotypic-BLUP model without it. Overall, we observed that higher values  
 319 for the phenotypic PA were obtained when marker-based relationship matrices were used,  
 320 when compared with phenotypic and pedigree BLUP (*I* and *A* matrices, respectively).  
 321 However, the marker-based and pedigree-based results were not always significantly  
 322 different from each other (Figure 3, Table S1). The use of molecular data yielded phenotypic  
 323 PA values ranging from 0.27 (pH) to 0.49 (fruit scar) in 2014, and from 0.15 (flower buds) to  
 324 0.51 (fruit firmness) in 2015. Lower PA values were obtained for traits with lower heritability  
 325 and better results were observed for the second year of evaluation. The biggest increase in the  
 326 PA values can be seen for fruit firmness – when we compared marker and pedigree results,  
 327 we observed an average increase of 13.37% in 2014. Also, an increase in the PA values of  
 328 11% was observed for fruit diameter and yield in 2015 when markers were used instead of  
 329 pedigree data.



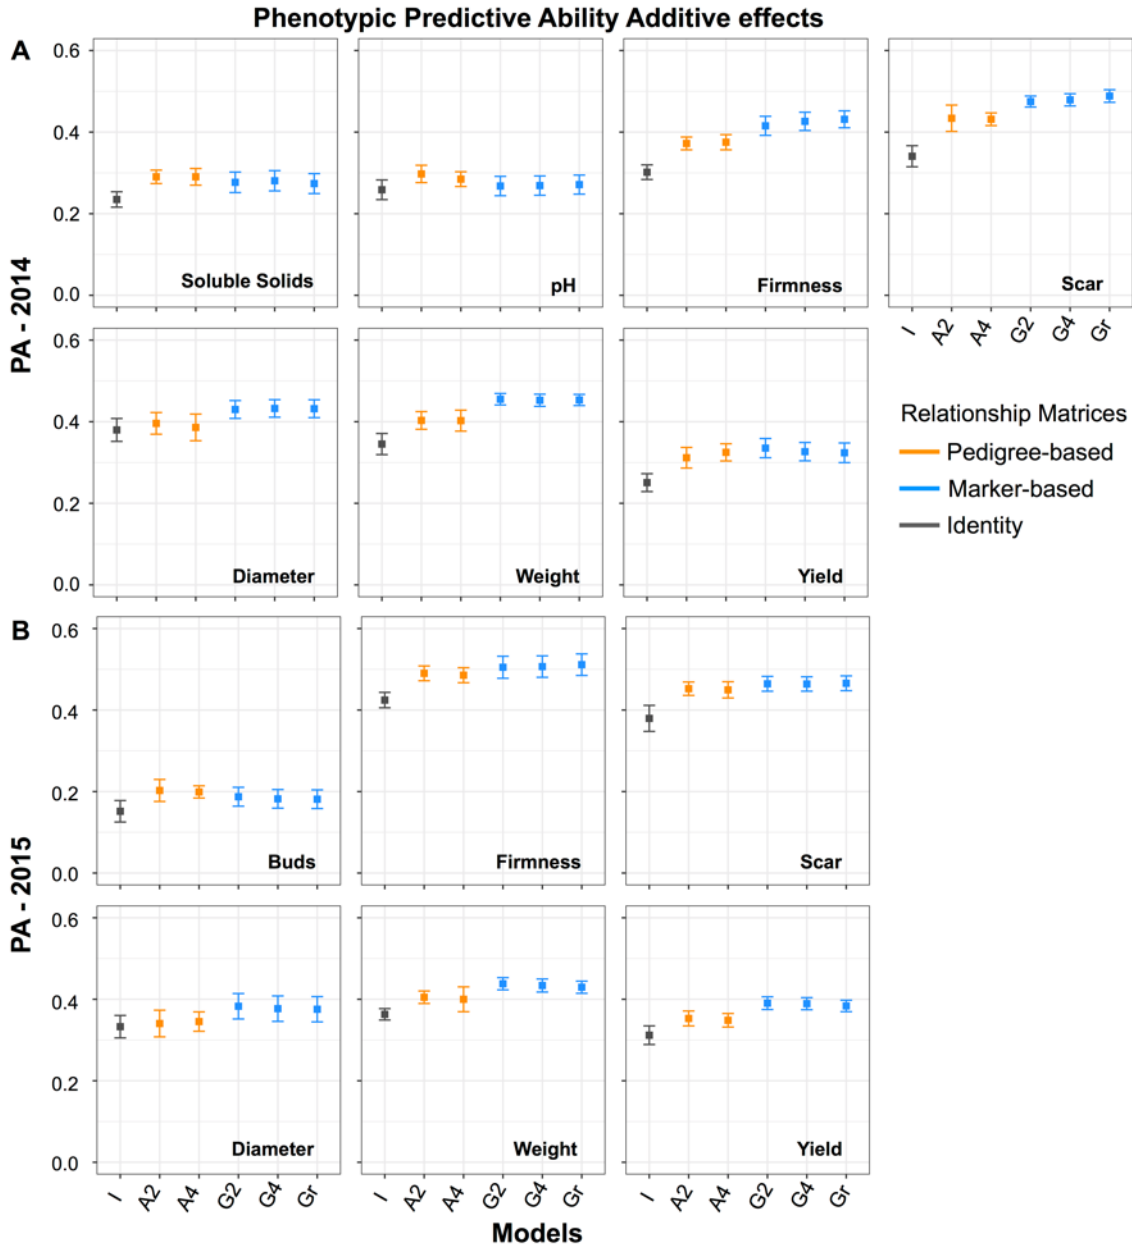

330  
 331 **Figure 3.** Phenotypic predictive abilities for (A) seven traits in 2014, and (B) for six traits in  
 332 2015 for different dosage parameterizations (indicated by the numbers 2 or 4) of the  
 333 relationship matrices (indicated by the letters I, A, and G) in the prediction of breeding values  
 334 of 1,847 SHB individuals.  
 335

336 The use of pedigree-based relationship matrices generated higher phenotypic PA  
 337 values for all the traits, when compared with the assumption of unrelated individuals (*i.e.*,  
 338 identity matrix). Unlike the identity matrix, the use of pedigree-based matrix assumes that  
 339 there is relationship (expected values) among individuals. The phenotypic PA obtained for  
 340 the pedigree methods in 2014 yielded values from 0.20 (flower bud) to 0.49 (fruit firmness).

341 As with marker-based methods, smaller values were observed for traits with lower  
342 heritability (*i.e.*, pH, brix, and flower bud). For 2015, the PA results for the phenotypic-  
343 BLUP were 0.36, 0.38, and 0.42, for fruit weight, fruit scar, and fruit firmness, respectively.  
344 The PA values obtained for the same traits with pedigree-BLUP were 0.40, 0.45, and 0.49,  
345 respectively. No significant differences between the models' stability were observed (Table  
346 S1).

347

### 348 **Use of dosage information and continuous genotypes**

349 Our results indicate that the importance of dosage in GS will vary depending on the  
350 trait being analyzed. For example, in 2014 the PA for fruit firmness, fruit scar, and fruit  
351 diameter showed modestly better phenotypic PA when the tetraploid and continuous  
352 parameterizations were applied, as opposed to the diploid parameterization (Figure 3, Table  
353 S1). Although no significant difference was observed between marker-based models, the use  
354 of relationship matrices derived from continuous genotype data (ploidy-free  
355 parameterization) performed equally well as the best models (Figure 3, Table S1). However,  
356 the goodness-of-fit statistics show that the use of a relationship matrix obtained from the  
357 continuous genotype data significantly improved model fit for all traits (Table 3). This was  
358 followed by the tetraploid parameterization using marker-based data.

359

### 360 **Expected genetic gain in a perennial fruit tree, blueberry**

361 The results obtained for the expected genetic gain (EGG) are summarized in Table 3.  
362 GS offers the possibility to accelerate genetic improvement by decreasing the breeding cycle  
363 and selecting superior individuals earlier in the breeding program. Considering a breeding  
364 cycle ( $L$ ) of 12 years (Cellon *et al.* 2018) we propose that routine genomic selection could be  
365 implemented in the second stage of the blueberry breeding program, which would allow the

366 omission of a whole stage (stage III), and a three-year reduction for cultivar release (Figure  
367 4).

368 Higher EGG was obtained for all traits when marker-based matrices (*i.e.*, genomic  
369 selection) were applied (Table 3), which was mainly related to the reduction in cycle time.  
370 The implementation of GS in the second stage population would lead to an increase in the  
371 EGG varying from 27% (pH) to 119% (scar) when compared with the application of  
372 phenotypic BLUP. Considering the comparison of marker-based and pedigree-based models,  
373 an increase of 15% (pH) to 41% (fruit weight, fruit scar, and flower buds) in the EGG was  
374 observed (Table 3). In addition, the use of continuous data generated EGG values that were  
375 not significantly different of the best models for all traits (Table 3).

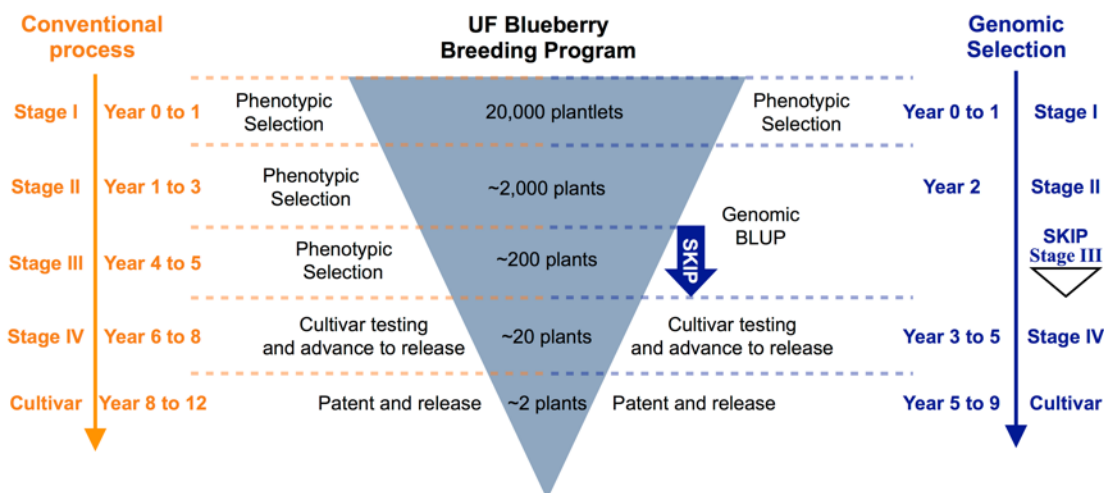

376 **Figure 4.** Example of the University of Florida blueberry breeding program stages and times  
377 of selection. Conventional process (left) compared with the proposed process implementing  
378 genomic selection (right).  
379  
380

## 381 DISCUSSION

382 In this study, six linear mixed models were applied to predict breeding values for  
383 eight yield and fruit-quality traits measured in a real blueberry breeding population as model.  
384 Analyses were based on phenotypic, pedigree, and high-density marker data from 1,847  
385 individuals. We compared the expected genetic gain, the stability, and the PA of models

386 considering different sources to build the relationship matrices (only phenotype=BLUP,  
387 phenotypes + pedigree=P-BLUP, phenotypes + genomic=G-BLUP). Our results also  
388 explored models accounting for ploidy information and proposed the use of genotypic data  
389 that is independent of assumptions regarding ploidy levels (continuous) to perform GS,  
390 avoiding the need for *a priori* parameterization for a given ploidy level.

391

## 392 **Continuous data**

393 Our research showed empirical evidences that the use of continuous genotypic data  
394 from NGS can be effectively applied in GS models for autotetraploid species. This method  
395 was tested and compared with marker calling methodologies at the individual level in  
396 genome wide association studies (Grandke *et al.* 2016). It was also tested in family pool data  
397 for GS (Ashraf *et al.* 2014; Guo *et al.* 2018), as well as used at the individual level in  
398 tetraploid potato for GS by Sverrisdottir *et al.* (2017). However, to our knowledge the  
399 comparison of continuous genotypes with ploidy parameterizations for genomic selection has  
400 not yet been reported. Here we empirically compare diploid, tetraploid, and continuous data  
401 at the individual level for the application of genomic selection in an autotetraploid species.

402 In polyploids, the assignment of genotypic classes based on NGS data is a major  
403 challenge, with high risk of misclassification (Grandke *et al.* 2016, Bourke *et al.* 2018). The  
404 problem is further exacerbated as the ploidy increases – for a given level of ploidy,  $n$ , the  
405 expected number of genotypic classes is  $2n+1$ . As a consequence, the signal distribution  
406 derived from each genotypic class increasingly approximates a continuous distribution where  
407 no clear separation is observed (Grandke *et al.* 2016). Despite extensive research to address  
408 these challenges (Serang *et al.* 2012), advances have been mostly limited to SNP arrays in  
409 tetraploid data (Carley *et al.* 2017). Studies that evaluated genotype calling with NGS data  
410 obtained from polyploids show that no method works properly, and that misclassification of

411 genotypes can significantly interfere in the results of genetic studies (Grandke *et al.* 2016).  
412 This misclassification can be observed in our results when a diploid, or tetraploid  
413 parameterization is used in the genomic data (Figure 2A-B) with standard parameters of  
414 filtering. The use of the continuous genotyping approach provides a relevant alternative to  
415 overcome this issue that is independent of assumptions regarding ploidy level. Models that  
416 used continuous genotypic data performed as well as the best models and resulted in  
417 modestly better predictive abilities for some of the traits (*i.e.*, fruit firmness, fruit scar, and  
418 fruit diameter; Table 3), but better data fit, which could indicate better prediction of future  
419 populations. The use of continuous genotypes also simplifies the analysis complexity and  
420 time by eliminating the genotype calling and parameterization for a give ploidy, because  
421 instead, the ratio of reads assigned to each allele are used. Finally, our results showed that the  
422 addition of noise associated with the continuous distribution in the genotypes significantly  
423 improved model fitting for all analyzed traits (Table 3), instead of increasing the complexity  
424 of the models. The benefits of continuous genotyping could easily be extended to more  
425 complex polyploids (higher ploidies), where the genotype attribution is even more difficult,  
426 however higher sequencing depth would probably be required. Meanwhile, for more complex  
427 models, such as those that consider dominance effects, dosage calling is still necessary.

428

## 429 **Relationship matrices**

430 Our results also showed that including information based on the genetic merit of the  
431 individuals yielded better results when compared with the phenotypic-BLUP analysis (based  
432 on the identity matrix; Table 3), corroborating previous studies in the literature (e.g., Muir  
433 2005; Resende *et al.* 2012a; Muñoz *et al.* 2014a). In addition, the use of marker-based  
434 methodologies generated better predictions than pedigree for most of the traits. Marker-based  
435 methods allow the capture of Mendelian segregation. This is especially important in our

436 population, since it was composed of 117 full-sib families. In this context, pedigree-based  
437 methods have no power to distinguish variance within families. Another advantage is that  
438 marker-based methods allows the computation of genetic similarity among unidentified  
439 individuals in the pedigree, and corrections of errors in the pedigree, which can affect  
440 parameter estimation causing reduction in the genetic gain (Muñoz *et al.* 2014b).

441 In our results, some non-significant differences between pedigree and marker-based  
442 methods were identified, which could be an effect of the extensive pedigree data used, as well  
443 as bias in pedigree-based estimations. Pedigree-based methods can overestimate the  
444 reliability of selection and consequently, the accuracy (Bulmer 1971; Gorjanc *et al.* 2015).  
445 Furthermore, it also presents low efficiency to capture and estimate genetic relationships  
446 among individuals (Resende *et al.* 2017).

447 It is interesting to notice that we used extensive pedigree information that dates back  
448 to 1907 for our predictions, which may not be common in other autopolyploid breeding. This  
449 extensive information can have significant implications on the estimation of relationship  
450 coefficients (Amadeu *et al.* 2016) and consequently, in breeding value predictions. For  
451 breeding programs with smaller pedigree depth information, the comparison between  
452 accuracies of prediction from marker and pedigree-based methodologies could be even bigger  
453 than what was found in our study.

454

#### 455 **Allele dosage**

456 The results obtained for both models that assumed more than three genotypic classes  
457 ( $G4$  and  $Gr$ ) demonstrate the importance of considering dosage in the prediction of breeding  
458 values. However, this will depend on the trait analyzed, as previously reported by Nyine *et al.*  
459 (2018) and Endelman *et al.* (2018). For example, modest improvement was verified in the PA  
460 for fruit firmness, fruit scar, and fruit diameter when this factor was considered in the models.

461 In addition, model fitting was significantly better for methods that accounted for dosage  
462 information (Figure 3, Table 3, Table S1). The inclusion of nonadditive effects into the  
463 models could also improve model accuracy. Endelman *et al.* (2018) demonstrated that the  
464 inclusion of digenic effects, as well as accounting for ploidy information, presented a higher  
465 accuracy over diploid models when using a SNP array.

466

### 467 **Genomic selection for perennial autopolyploids**

468 We also demonstrate the value of applying GS in a perennial fruit tree, blueberry. One  
469 cycle of blueberry breeding takes from 12 to 15 years until the release of a new cultivar  
470 (Lyrene 2008; Cellon *et al.* 2018). By applying selection based on high-density markers at  
471 early stages of the program, the time to cultivar release could decrease by three years (Figure  
472 4), significantly improving the expected genetic gain per unit of time. More specifically, the  
473 use of GS would lead to an average increase of 86% in the EGG when compared with  
474 phenotypic BLUP, and an average increase of 32% over the application of pedigree-based  
475 models (Table 3). Implementing GS in this form could eliminate one stage in the breeding  
476 and selection process toward cultivar development, which will reduce costs associated with  
477 field trials and phenotyping. The implementation of GS would require extra financial outlay  
478 when genotyping and accurately phenotyping the training population. However, the savings  
479 on phenotyping and field trials of future generations (selection populations) could result in a  
480 break-even financial exercise, and as a result could be a cost-effective application of GS.  
481 However, this financial analysis needs to be performed for each crop in a case-by-case basis.

482

483

484

485

486 **Funding**

487 USDA - Agriculture and Food Research Initiative Grant no. 2014-67013-22418 to Patricio R.

488 Munoz, James W. Olmstead and Jeffrey B. Endelman from the USDA National Institute of

489 Food and Agriculture.

490 Ivone de Bem Oliveira was funded by the CAPES (Coordenação de Aperfeiçoamento de

491 Pessoal de Nível Superior) [PSDE scholarship: 88881.131685/2016-01].

492

493 **Acknowledgments**

494 The authors thank the University of Florida blueberry breeding program technical support,

495 especially Dr. Paul M. Lyrene, David Norden, and Werner Collante. Special thanks to James

496 Olmstead and Catherine Cellon, who coordinate the phenotyping and genotyping of the

497 population as part of Catherine Cellon MS degree.

498

499



500 **Supplemental Material**

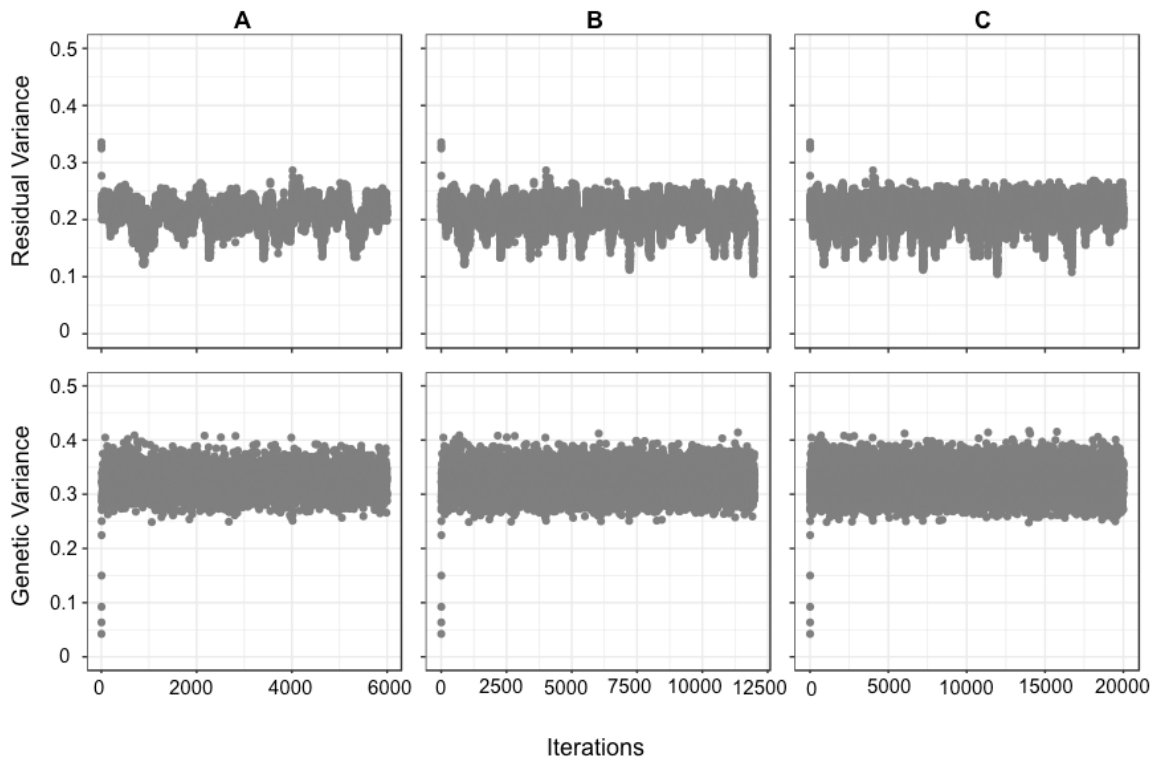

501 **Figure S1.** Model convergence obtained using different values for iterations (I), burn-in (B)  
502 and thinning (T) to perform the GS in BGLR for 1847 SHB genotypes. **A)** I=30K B=5K and  
503 T =5; **B)** I=60K B=10K and T =5; **C)** I=100K B=10K and T =5.

505

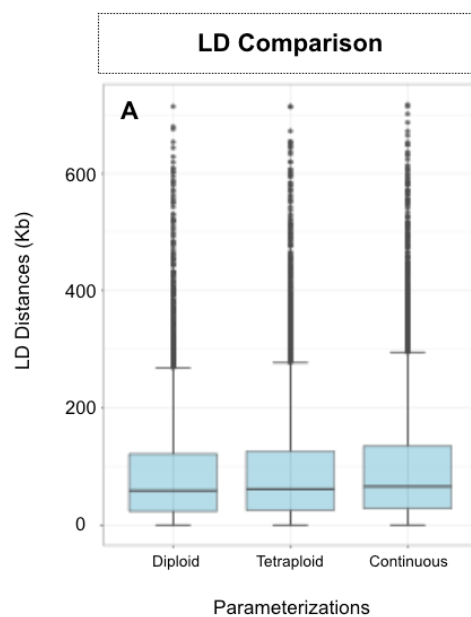

506 **Figure S2.** Distribution of linkage disequilibrium distances at the empirical threshold  $r^2=0.2$   
507 for the diploid, tetraploid and continuous parameterizations.  
508

509

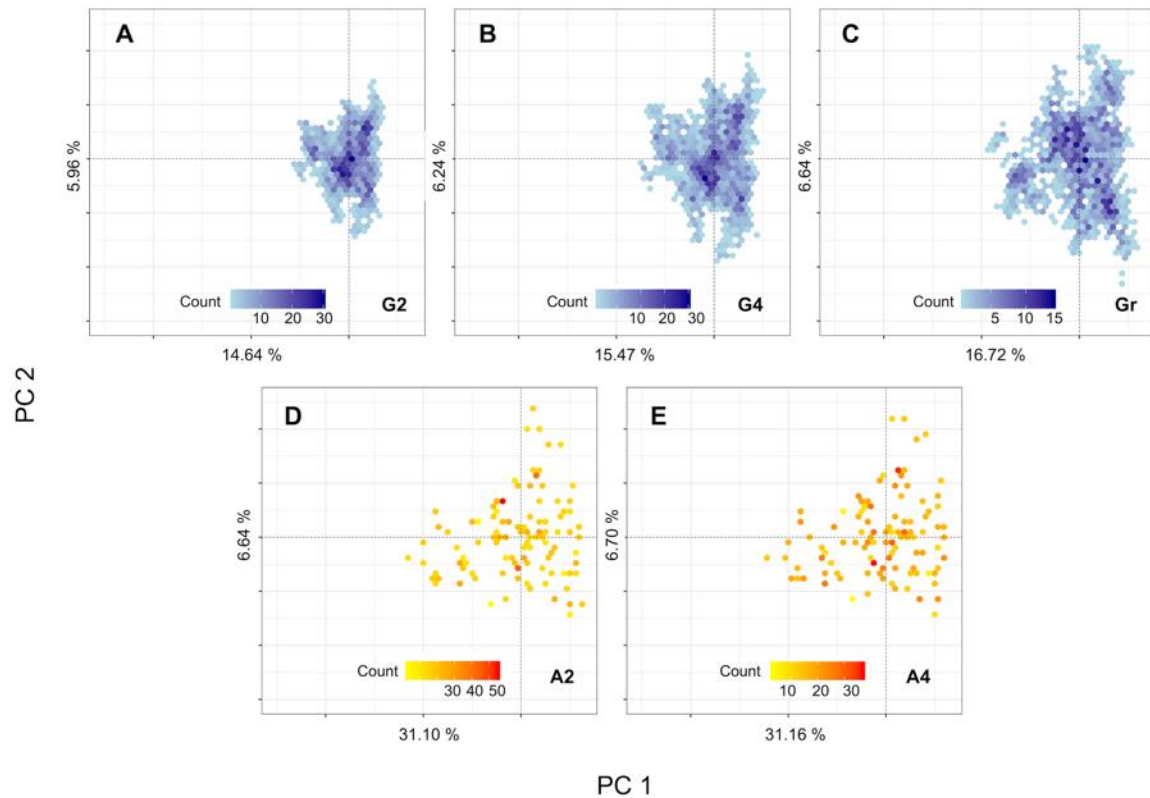

510  
 511 **Figure S3.** Principal components heat plots for the relationship matrices used in this study. In  
 512 blue are the marker-based, and in orange are the pedigree-based matrices. Genomic matrices  
 513 were computed using VanRaden's (2008) methodology (**A**) Diploid, (**B**) tetraploid, and (**C**)  
 514 continuous relationship matrix. Pedigree-based matrices were computed for the additive  
 515 effects using (**D**) Henderson (1976) methodology for diploid, and (**E**) Kerr *et al.* (2012)  
 516 methodology for tetraploid.  
 517

518 **Table S1.** Accuracy and model stability values for eight yield and fruit-related traits analyzed  
 519 with six linear mixed models with different dosage parameterizations of the relationship  
 520 matrices. Source of information, and dosage parameterizations for the relationship matrices  
 521 indicated by the letters (*I*, *A*, or *G*), and numbers (2 or 4), respectively\*  
 522

| Trait                 | Relationship matrix | Predictive ability 2014 | Predictive ability 2015 | MSE (2014) | MSE (2015) |
|-----------------------|---------------------|-------------------------|-------------------------|------------|------------|
| Soluble Solid (°Brix) | <i>I</i>            | 0.235 a                 | -                       | 5.795 a    | -          |
|                       | <i>A2</i>           | 0.290 a                 | -                       | 4.926 a    | -          |
|                       | <i>A4</i>           | 0.290 a                 | -                       | 4.531 a    | -          |
|                       | <i>G2</i>           | 0.277 a                 | -                       | 2.238 a    | -          |
|                       | <i>G4</i>           | 0.281 a                 | -                       | 2.197 a    | -          |
|                       | <i>Gr</i>           | 0.274 a                 | -                       | 2.216 a    | -          |
| Flower Buds           | <i>I</i>            | -                       | 0.152 a                 | -          | 9.261 a    |
|                       | <i>A2</i>           | -                       | 0.203 a                 | -          | 8.280 a    |
|                       | <i>A4</i>           | -                       | 0.199 a                 | -          | 8.039 a    |
|                       | <i>G2</i>           | -                       | 0.187 a                 | -          | 11.469 a   |

|                |           |          |          |            |            |
|----------------|-----------|----------|----------|------------|------------|
| Fruit Diameter | <i>G4</i> | -        | 0.182 a  | -          | 11.718 a   |
|                | <i>Gr</i> | -        | 0.181 a  | -          | 11.860 a   |
|                | <i>I</i>  | 0.38 a   | 0.333 a  | 8.827 a    | 8.918 a    |
|                | <i>A2</i> | 0.396 a  | 0.340 a  | 8.072 a    | 8.638 a    |
|                | <i>A4</i> | 0.386 a  | 0.345 a  | 9.134 a    | 3.409 a    |
|                | <i>G2</i> | 0.403 a  | 0.383 a  | 19.796 a   | 6.339 a    |
|                | <i>G4</i> | 0.432 a  | 0.377 a  | 19.423 a   | 6.484 a    |
|                | <i>Gr</i> | 0.432 a  | 0.376 a  | 19.718 a   | 7.241 a    |
| Fruit Firmness | <i>I</i>  | 0.302 b  | 0.425 a  | 2725.511 a | 1109.026 a |
|                | <i>A2</i> | 0.372 ab | 0.490 a  | 2146.811 a | 734.108 a  |
|                | <i>A4</i> | 0.375 ab | 0.486 a  | 778.212 a  | 1490.294 a |
|                | <i>G2</i> | 0.415 a  | 0.505 a  | 1240.152 a | 2083.417 a |
|                | <i>G4</i> | 0.426 a  | 0.507 a  | 1245.192 a | 2085.359 a |
|                | <i>Gr</i> | 0.431 a  | 0.511 a  | 1250.673 a | 2124.308 a |
| pH             | <i>I</i>  | 0.259 a  | -        | 0.244 a    | -          |
|                | <i>A2</i> | 0.297 a  | -        | 0.257 a    | -          |
|                | <i>A4</i> | 0.285 a  | -        | 0.126 a    | -          |
|                | <i>G2</i> | 0.268 a  | -        | 0.253 a    | -          |
|                | <i>G4</i> | 0.269 a  | -        | 0.259 a    | -          |
|                | <i>Gr</i> | 0.271 a  | -        | 0.256 a    | -          |
| Fruit Scar     | <i>I</i>  | 0.341 b  | 0.380 a  | 0.236 a    | 0.424 a    |
|                | <i>A2</i> | 0.434 a  | 0.452 a  | 0.113 a    | 0.416 a    |
|                | <i>A4</i> | 0.432 a  | 0.45 a   | 0.112 a    | 0.181 a    |
|                | <i>G2</i> | 0.475 a  | 0.464 a  | 0.160 a    | 0.197 a    |
|                | <i>G4</i> | 0.479 a  | 0.464 a  | 0.160 a    | 0.199 a    |
|                | <i>Gr</i> | 0.488 a  | 0.466 a  | 0.171 a    | 0.184 a    |
| Fruit Weight   | <i>I</i>  | 0.345 b  | 0.363 a  | 0.502 a    | 0.337 a    |
|                | <i>A2</i> | 0.403 ab | 0.405 a  | 0.529 a    | 0.391 a    |
|                | <i>A4</i> | 0.403 ab | 0.400 a  | 0.404 a    | 1.100 a    |
|                | <i>G2</i> | 0.455 a  | 0.438 a  | 1.030 a    | 0.615 a    |
|                | <i>G4</i> | 0.453 a  | 0.434 a  | 1.059 a    | 0.630 a    |
|                | <i>Gr</i> | 0.453 a  | 0.430 a  | 1.027 a    | 0.702 a    |
| Yield          | <i>I</i>  | 0.251 a  | 0.312 b  | 0.881 a    | 1.221 a    |
|                | <i>A2</i> | 0.312 a  | 0.353 ab | 0.661 a    | 1.214 a    |
|                | <i>A4</i> | 0.325 a  | 0.348 ab | 0.638 a    | 1.730 a    |
|                | <i>G2</i> | 0.335 a  | 0.390 a  | 1.191 a    | 2.343 a    |
|                | <i>G4</i> | 0.327 a  | 0.389 a  | 1.263 a    | 2.308 a    |
|                | <i>Gr</i> | 0.324 a  | 0.384 ab | 1.297 a    | 2.294 a    |

523 \*Letters based on Tukey test performed considering estimations obtained from 10 independent runs of the full  
 524 models with BGLR (equation 1).  
 525

526

527

528

## 529 Literature Cited

- 530 Adams, K. L., R. Cronn, R. Percifield, and J. F. Wendel, 2003 Genes duplicated by  
531 polyploidy show unequal contributions to the transcriptome and organ-specific reciprocal  
532 silencing. *Proc. Natl. Acad. Sci.* 100: 4649-4654.  
533
- 534 Amadeu, R. R., C. Cellon, J. W. Olmstead, A. A. Garcia, M. F. Resende *et al.*, 2016  
535 AGHmatrix: R Package to construct relationship matrices for autotetraploid and diploid  
536 species: a blueberry example. *Plant Genome* 9: 3.  
537
- 538 Annicchiarico, P., N. Nazzicari, X. Li, Y. Wei, L. Pecetti *et al.*, 2015 Accuracy of genomic  
539 selection for alfalfa biomass yield in different reference populations. *BMC genomics*, 16:  
540 1020.  
541
- 542 Ashraf, B., V. Edriss, D. Akdemir, E. Autrique, D. Bonnett *et al.*, 2016. Genomic prediction  
543 using phenotypes from pedigreed lines with no marker data. *Crop Sci.* 56: 957-964.  
544
- 545 Ashraf, B. H., J. Jensen, T. Asp, and L. L. Janss, 2014 Association studies using family pools  
546 of outcrossing crops based on allele-frequency estimates from DNA sequencing. *Theor. Appl.*  
547 *Genet.* 127:1331-1341.  
548
- 549 Bian, Y., J. Ballington, A. Raja, C. Brouwer, R. Reid, M. Burke *et al.*, 2014 Patterns of  
550 simple sequence repeats in cultivated blueberries (*Vaccinium* section *Cyanococcus* spp.) and  
551 their use in revealing genetic diversity and population structure. *Mol. Breed.* 34: 675-689.  
552
- 553 Birchler, J. A., U. Bhadra, M. P. Bhadra, and D. L. Auger, 2001 Dosage-dependent gene  
554 regulation in multicellular eukaryotes: implications for dosage compensation, aneuploid  
555 syndromes, and quantitative traits. *Dev. Biol.* 234: 275-288.  
556
- 557 Bourke, P. M., R. E. Voorrips, R. G. Visser, and C. Maliepaard, 2018 Tools for genetic  
558 studies in experimental populations of polyploids. *Front. Plant Sci.* 9: 513.  
559
- 560 Bulmer, M., 1971 The effect of selection on genetic variability. *Am. Nat.* 105: 201-211.  
561
- 562 Carley, C. A. S., J. J. Coombs, D. S. Douches, P. C. Bethke, J. P. Palta *et al.*, 2017.  
563 Automated tetraploid genotype calling by hierarchical clustering. *Theor. Appl. Genet.* 130:  
564 717-726.  
565
- 566 Cellon, C., R. R. Amadeu, J. W. Olmstead, M. R. Mattia, L. F. V. Ferrao *et al.*, 2018  
567 Estimation of genetic parameters and prediction of breeding values in an autotetraploid  
568 blueberry breeding population with extensive pedigree data. *Euphytica*, 214: 1-13.  
569
- 570 Comai, L., 2005 The advantages and disadvantages of being polyploid. *Nat. Rev. Genet.* 6:  
571 836.

572  
573 de Los Campos, G., and P. Perez-Rodriguez, 2016 BGLR: Bayesian Generalized Linear  
574 Regression. R package version 1.0.5. <https://cran.r-project.org/package=BGLR>  
575  
576 de los Campos, G., J. M. Hickey, R. Pong-Wong, H. D. Daetwyler, and M. P. Calus, 2012  
577 Whole genome regression and prediction methods Applied to plant and animal  
578 breeding. *Genetics* 112.  
579  
580 Desta, Z. A., and R. Ortiz, 2014 Genomic selection: genome-wide prediction in plant  
581 improvement. *Trends Plant Sci.* 19: 592-601.  
582  
583 Dufresne, F., M. Stift, R. Vergilino, R., and B. K. Mable, 2014 Recent progress and  
584 challenges in population genetics of polyploid organisms: an overview of current state-of-the-  
585 art molecular and statistical tools. *Mol. Ecol.* 23: 40-69.  
586  
587 Endelman, J. B., C. A. S. Carley, P. C. Bethke, J. J. Coombs, M. E. Clough *et al.*, 2018  
588 Genetic variance partitioning and genome-wide prediction with allele dosage information in  
589 autotetraploid potato. *Genetics*, 300685.  
590  
591 Ferrão, L. F. V., J. Benevenuto, I. de Bem Oliveira, C. Cellon, J. Olmstead *et al.*, 2018  
592 Insights into the genetic basis of blueberry fruit-related traits using diploid and polyploid  
593 models in a GWAS context. *Front. Ecol. Evol.* 6: 107.  
594  
595 Garcia, A. A., M. Mollinari, T. G. Marconi, O. Serang, R. R. Silva *et al.*, 2013 SNP  
596 genotyping allows an in-depth characterisation of the genome of sugarcane and other  
597 complex autopolyploids. *Sci. Rep.* 3: 3399.  
598  
599 Garrison, E., and G. Marth, 2012 Haplotype-based variant detection from short-read  
600 sequencing. arXiv preprint arXiv:1207.3907.  
601  
602 Gorjanc, G., P. Bijma, and J. M. Hickey, 2015 Reliability of pedigree-based and genomic  
603 evaluations in selected populations. *Genet. Sel. Evol.* 47: 65.  
604  
605 Gouy, M., Y. Rousselle, D. Bastianelli, P. Lecomte, L. Bonnal *et al.*, 2013 Experimental  
606 assessment of the accuracy of genomic selection in sugarcane. *Theor. Appl. Genet.* 126: 2575-  
607 2586.  
608  
609 Grandke, F., P. Singh, H. C. Heuven, J. R. De Haan, and D. Metzler, 2016 Advantages of  
610 continuous genotype values over genotype classes for GWAS in higher polyploids: a  
611 comparative study in hexaploid chrysanthemum. *BMC Genomics* 17: 672.  
612  
613 Guo, M., D. Davis, and J. A. Birchler, 1996 Dosage effects on gene expression in a maize  
614 ploidy series. *Genetics* 142: 1349-1355.  
615

- 616 Guo, X., F. Cericola, D. Fè, M. G. Pedersen, I. Lenk, C. S. Jensen *et al.*, 2018 Genomic  
617 Prediction in Tetraploid Ryegrass Using Allele Frequencies Based on Genotyping by  
618 Sequencing. *Front. Plant. Sci.* 9.  
619
- 620 Gupta, V., A. D. Estrada, I. Blakley, R. Reid, K. Patel, M. D. Meyer *et al.*, 2015 RNA-Seq  
621 analysis and annotation of a draft blueberry genome assembly identifies candidate genes  
622 involved in fruit ripening, biosynthesis of bioactive compounds, and stage-specific alternative  
623 splicing. *Gigascience* 4: 5.  
624
- 625 Henderson, C. R., 1976 A simple method for computing the inverse of a numerator  
626 relationship matrix used in prediction of breeding values. *Biometrics* 32: 69-83.  
627
- 628 Hieter, P., and T. Griffiths, 1999 Polyploidy--more is more or less. *Science* 285: 210-211.  
629
- 630 Kerr, R. J., L. Li, B. Tier, G. W. Dutkowski, and T. A. McRae, 2012 Use of the numerator  
631 relationship matrix in genetic analysis of autopolyploid species. *Theor. Appl. Genet.* 124:  
632 1271-1282.  
633
- 634 Lee, W. P., M. P. Stromberg, A. Ward, C. Stewart, E. P. Garrison *et al.*, 2014 MOSAIK: a  
635 hash-based algorithm for accurate next-generation sequencing short-read mapping. *PloS*  
636 *one* 9: e90581.  
637
- 638 Lyrene, P. 2008 Breeding southern highbush blueberries. *Plant Breed. Rev.* 30: 353-414.  
639
- 640 Lyrene, P., 2002 Development of highbush blueberry cultivars adapted to Florida. *J. Am.*  
641 *Pomol. Soc.* 56: 79.  
642
- 643 Hayes, B. J., and M. E. Goddard, 2001 Prediction of total genetic value using genome-wide  
644 dense marker maps. *Genetics*, 157: 1819-1829.  
645
- 646 Mollinari, M., and O. Serang, 2015 Quantitative SNP genotyping of polyploids with  
647 MassARRAY and other platforms, pp. 215-241 in *Plant Genotyping* edited by Humana Press,  
648 New York, NY.  
649
- 650 Muir, W. M., 2007 Comparison of genomic and traditional BLUP-estimated breeding value  
651 accuracy and selection response under alternative trait and genomic parameters. *J. Anim.*  
652 *Breed. Genet.* 124: 342-355.  
653
- 654 Munoz, P. R., M. F. Resende, D. A. Huber, T. Quesada, M. D. Resende, D. B. Neal *et al.*  
655 2014a. Genomic relationship matrix for correcting pedigree errors in breeding populations:  
656 impact on genetic parameters and genomic selection accuracy. *Crop Sci.* 54: 1115-1123.  
657

658 Muñoz, P. R., M. F. Resende, S. A. Gezan, M.D. V. Resende, G. de los Campos *et al.*, 2014b  
659 Unraveling additive from non-additive effects using genomic relationship matrices. *Genetics*  
660 114.  
661  
662 Nyine, M., B. Uwimana, N. Blavet, E. Hřibová, H. Vanrespaille *et al.*, 2018. Genomic  
663 prediction in a multiploid crop: genotype by environment interaction and allele dosage effects  
664 on predictive ability in banana. *Plant Genome* 11:170090.  
665  
666 Osborn, T. C., J. C. Pires, J. A. Birchler, D. L. Auger, Z. J. Chen *et al.*, 2003 Understanding  
667 mechanisms of novel gene expression in polyploids. *Trends Genet.* 19: 141-147.  
668  
669 Pérez, P., and G. de Los Campos, 2014 Genome-wide regression & prediction with the  
670 BGLR statistical package. *Genetics* 114.  
671  
672 R Core Team, 2018 R: A Language and Environment for Statistical Computing.  
673  
674 Resende, M. F. R., P. Muñoz, J. J. Acosta, G. F. Peter, J. M. Davis *et al.*, 2012 Accelerating  
675 the domestication of trees using genomic selection: accuracy of prediction models across ages  
676 and environments. *New Phytol.* 193: 617-624.  
677  
678 Resende, M. F., P. Muñoz, M. D. Resende, D. J. Garrick, L. R. Fernando *et al.*, 2012  
679 Accuracy of genomic selection methods in a standard dataset of loblolly pine (*Pinus taeda*  
680 L.). *Genetics* 111.  
681  
682 Resende, R. T., M. D. V. Resende, F. F. Silva, C. F. Azevedo, E. K. Takahashi *et al.*, 2017  
683 Assessing the expected response to genomic selection of individuals and families in  
684 Eucalyptus breeding with an additive-dominant model. *Heredity* 119: 245.  
685  
686 Schindelin, J., I. Arganda-Carreras, E. Frise, V. Kaynig, M. Longair *et al.*, 2012 Fiji: an  
687 open-source platform for biological-image analysis. *Nat. methods* 9: 676.  
688  
689 Serang, O., M. Mollinari, and A. A. F. Garcia, 2012 Efficient exact maximum a posteriori  
690 computation for bayesian SNP genotyping in polyploids. *PLoS One*, 7: e30906.  
691  
692 Slater, A. T., N. O. Cogan, J. W. Forster, B. J. Hayes, and H. D. Daetwyler, 2016 Improving  
693 genetic gain with genomic selection in autotetraploid potato. *Plant Genome*, 9: 3.  
694  
695 Slater, A. T., G. M. Wilson, N. O. Cogan, J. W. Forster, and B. J. Hayes, 2014 Improving the  
696 analysis of low heritability complex traits for enhanced genetic gain in potato. *Theor. Appl.*  
697 *Genet.* 127: 809-820.  
698  
699 Soltis, D. E., and P. S. Soltis, 1999 Polyploidy: recurrent formation and genome  
700 evolution. *Trends Ecol. Evol.* 14: 348-352.  
701

- 702 Soltis, D. E., P. S. Soltis, D. W. Schemske, J. F. Hancock, J. N. Thompson *et al.*, 2007  
703 Autopolyploidy in angiosperms: have we grossly underestimated the number of  
704 species?. *Taxon*, 56: 13-30.  
705
- 706 Soltis, D. E., C. J. Visger, D. B. Marchant, and P. S. Soltis, 2016 Polyploidy: pitfalls and  
707 paths to a paradigm. *Am. J. Bot.* 103: 1146-1166.  
708
- 709 Spoelhof, J. P., P. S. Soltis, and D. E. Soltis, 2017 Pure polyploidy: closing the gaps in  
710 autopolyploid research. *J. Syst. Evol.* 55: 340-352.  
711
- 712 Sverrisdóttir, E., S. Byrne, E. H. R. Sundmark, H. Ø. Johnsen, H. G. Kirk *et al.*, 2017  
713 Genomic prediction of starch content and chipping quality in tetraploid potato using  
714 genotyping-by-sequencing. *Theor. Appl. Genet.* 130: 2091-2108.  
715
- 716 Uitdewilligen, J. G., A. M. A. Wolters, B. Bjorn, T. J. Borm, R. G. Visser *et al.*, 2013 A next-  
717 generation sequencing method for genotyping-by-sequencing of highly heterozygous  
718 autotetraploid potato. *PloS one* 8: e62355.  
719
- 720 VanRaden, P. M., 2008 Efficient methods to compute genomic predictions. *J. Dairy Sci.* 91:  
721 4414-4423.  
722
- 723 Zhang, Z., X. Ding, J. Liu, D. J. de Koning, and Q. Zhang, 2011 Genomic selection for QTL-  
724 MAS data using a trait-specific relationship matrix. *BMC Proc.* 5: S15.  
725
